# Supplementary material for: Expanding the zinc-finger recombinase repertoire: directed evolution and mutational analysis of serine recombinase specificity determinants
Source: PubMed Central journal article supplement — Nucleic Acids Res. 2014 Jan 21;42(7):4755–66. doi: 10.1093/nar/gkt1389 (PMC3985619; doi:10.1093/nar/gkt1389), 2014-01-21
Supplement: supp_gkt1389_nar-03331-h-2013-File006.pdf [file supp_gkt1389_nar-03331-h-2013-File006.pdf]

**Supporting Information:**

**Expanding the zinc-finger recombinase repertoire: Directed evolution and mutational analysis of serine recombinase specificity determinants**

Shannon J. Sirk, Thomas Gaj, Andreas Jonsson<sup>†</sup>, Andrew C. Mercer<sup>‡</sup>, and Carlos F. Barbas III

The Skaggs Institute for Chemical Biology and the Departments of Chemistry and Cell and Molecular Biology, The Scripps Research Institute, La Jolla, CA 92037 USA

<sup>†</sup>Current address: Royal Institute of Technology, Stockholm, Sweden

<sup>‡</sup>Current address: MedImmune, Gaithersburg, MD, United States

Corresponding author: [carlos@scripps.edu](mailto:carlos@scripps.edu)

> $\beta$ -H1

MAKIGYARVSSKEQNLDLDRQLQALQGVSKVFSKLSGQSVERPQLQAMLNLYIREGDIVVTELDRLGRNNKELTELMNAIQKQATLEVLNLP SMNGIEDENLRRLINNLVIELYKYQAESERKRIKERQAQIEIAKSKGKFKGRQHKGEMPYKCPECGKSF SRSDVLRHQRTHTGEKPYKCPECGKSFSDPGHLVRHQRTHTGEKPYKCPECGKSF SQSSHLVRHQRTHTGKKT\*

>Sin-H1

MIIGYARVSSIDQNLERQLDNLKTFGVEKIFTEKQSGKSVENRPVFQEALNFVRMGDRFVVESTI DRLGRNYDEIIE TVNYLKEKDVQLMITS LPMNEVTGNPLLDKFMKDLIIQILAMVSEQERNESKRRQAQGIQVAKEKGVYKGRPLL GEMPYKCPECGKSF SRSDVLRHQRTHTGEKPYKCPECGKSFSDPGHLVRHQRTHTGEKPYKCPECGKSF SQSSHLVRHQRTHTGKKT\*

**Supplementary Table S1. Amino acid sequences of the wild-type  $\beta$  and Sin zinc-finger recombinases used in this study. The H1 zinc-finger domain is colored green.**

MAKIGYARVSSKEQNDRQLQALQGVSKVFSKLSGQSVERPQLQAMLN YIREGDIVVVT 60  
MAKIGYARVSSKEQNDRQLQALQGVSKVFSKLSGQSVERPQLQAMLN YIREGDIVVVT 60  
MAKIGYARVSSKEQNDRQLQALQGVSKVFSKLSGQSVERPQLQAMLN YIREGDIVVVT 60  
MAKIGYARVSSKEQNDRQLQALQGVSKVFSKLSGQSVERPQLQAMLN YIREGDIVVVT 60  
MAKIGYARVSSKEQNDRQLQALQGVSKVFSKLSGQSVERPQLQAMLN YIREGDIVAVT 60  
MAKIGYARVSSKEQNLGRQLQALQGVSKVFSKLSGQSVERPQLQAMLN YIREGDIVVVT 60  
MAKIGYARVSSKEQNDRQLQALQGVSKVFSKLSGQSVERPQLQAMLN YIRGDTVVT 60  
MAKIGYARVSSKEQNDRQLQALQGVSKVFSDRLSGQSVERPQLQAML SYIREGDIVVVT 60  
MAKIGYARVSSKEQNDRQLQALQGM SKVFSKLSGQSVERPQLQAML SYIREGDIVVVT 60  
MAKIGYARVSSKEQNDRQLQALQGVSKVFSKLSGQSVERPQLQAMLN YIREGDIVVVT 60  
MAKIGYARVSSKEQNDRQLQALQGVSKVFSKLSGQSVERPQLQAMLN YIREGDIVVVT 60  
MAKIGYARVSSKEQNDRQLQALQGVSKVFSKLSGQSVERPQLQAMLN YIREGDIVVVT 60  
MAKIGYARVSSKEQNDRQLQALQGVSKVFSKLSAQSVERPQLQAMLN YIREGDIVVVT 60  
MAKIGYARVSSKEQNDRQLQALQGVSKVFSKLSGQSVERPQLQAMLN YIREGGIVVVT 60  
MAKIGYARVSSKEQNDRQLQALQGVSKVFSKLSGQSVERPQLQAMLN YIREGDIVVVT 60

ELDRLGRNNKELTELMNAIQQKGATLEVLNLP S MNGIEDENLRRLINNLVIELYKYQAES 120  
ELDRLGRNNKELTELMNAIQQKGATLEVLNLP S MDGIEDENLRRLINNLVIELYKYQAES 120  
ELDRLGRNNKELTELMNAIQQKGATLEVLNLP S MDGIEDENLRRLINNLVIELYKYQAES 120  
ELDRLGRNNRELTELMNAIQQKGATLEVLNLP S MDGIEDENLRRLINNLVIELYKYQAES 120  
ELDRLGRNNRELTELMNAIQQKGATLEVLNLP S MDGIEDENLRRLINNLVIELYKYQAES 120  
ELDRLGRNNKELTELMNTIQQKGATLEVLNLP S MDGIEDENLRRLINNLVIELYKYQAES 120  
ELDRLGRNNKELTELMNAIQQKGATLEVLNLP S MDGIEDENLRRLISNLVIELYKYQAES 120  
ELDRLGRNNKGLTELMNAIQQKGATLEVLNLP S MDGIEDENLRRLINNLVIELYKYQAES 120  
ELDRLGRNNKELTELMNAIQQKGATLEVLNLP S MDGIEDENLRRLINNLVIELYKYQAES 120  
ELDRLGRNNKGLTELMNAIQQKGATLEVLNLP S VDGIEDENLRRLINNLVIELYKYQAES 120  
ELDRLGRSNKGLTELMNAIQQKGATLEALNLP S MDGIEDENLRRLINNLVIELYKYQAES 120  
ELDRLGRNNKELTELMNAIQQKGATLEVLNLP S TDGIEDENLRRLINNLVIELYKYQAES 120  
ELDRLGRNNKELTELMNAIQQKGATLEVLNLP S MNGIEDENLRRLINNLVIELYKYQAES 120  
ELDRLGRNNKELTELMNAIQQKGATLEVLNLP S TNGIEDENLRHLINNLVIELYKYQAES 120  
ELDRLGRNNKELTELMNAIQQKGATLEVLNLP S VNGIEDENLRRLISNLVIELYKYQAES 120  
ELDRLGRNNKELTELMNVIQQKGALEVLNLP S VNGIEDENLRRLINNLVIELYKYQAES 120  
ELDRLGNNKGLTELMNAIQQKGATLEVLNLP S INGIEDENLRRLIKNLVIELNKYQAES 120  
ELDRLGRNNKELTELMNAIQQKGATLEVLNLP S VNGIEDENLRRLINNLVIELYKYQAES 120



MIIGYARVSSIDQNLERQLDNLKTFGVEKIFTEKQSGKSVENRPVFQEALNFVRMGDRFV 60  
MIIGYARVSSIDQNLERQLDNLKTFGVEKIFTEKQSGKSVENRPVFQEALNFVRMGDRFV 60  
MIIGYARVSSIDQNLERQLDNLKTFGVEKIFTEKQSGKSVENRPVFQEALNFVRMGDRFV 60  
MIIGYARVSSIDQNLERQLDNLKTFGVEKIFTEKQSGKSVENRPVFQEALNFVRMGDRFV 60  
MIIGYARVSSIDQNLERQLDNLKTFGVEKIFTEKQSGKSVENRPVFQEALNFVRMGDRFV 60  
MIIGYARVSSIDQNLGRQLDNLKTFGVEKIFTEKQSGKSVENRPVFQEALNFVRMGDRFV 60  
MIIGYARVSSVNDQNLERQLDNLKTFGVEKIFTEKQSGKSVENRPVFQEALNFVRMGDRFV 60  
MIIGYARVSSVDQNLERQLDNLKTFGVGKIFTEKQSGKSVENRPVFQEALNFVRMGDRFV 60  
MIIGYARVSSIDQNLERQLDNLKTFGVEKIFAEKQSGKSVENRPVFQEALNFVRMGDRFV 60  
MVIIGYARVSSIDQNLERQLDNLKTFGVEKIFTEKQSGKSVENRPVFQEALNFVRMGDRFV 60  
MIIGYARVSSIDQNLERQLDNLKTFGVEKIFTEKQSGKSVENRPVFQEALNFVRMGDRFV 60  
MIIGYARVSSIDQNLERQLDNLKTFGVEKIFTEKQSGKSVENRPVFQEALNFVRMGDRFV 60  
MIIGYARVSSIDQNLERQLDNLKTFGVEKIFTEKQSGKSVENRPVFQEALNFVRMGDRFV 60  
MIIGYARVSSIDQNLERQLDNLKTFGVEKIFTEKQSGKSVENRPVFQETLNFVRMGDRFV 60  
MIIGYARVSSIDQNLERQLDNLKTFGVEKIFTEKQSGKSVENRPVFQEALNFVRMGDRFV 60  
MIIGYARVSSIDQNLERQLDNLKTFGVEKIFTEKQSGKSVENRPVFQGALNFVRMGDRFV 60  
MIIGYARVSSIDQNLERQLDNLKTFGVEKIFTEKQSGKSVENRPVFQEALNFVRMGDRFV 60  
MIVGYARVSSIDQNLERQLDNLKTFGVEKIFTEKQSGKSVENRPVFQEALNFVRMGDRFV 60  
MIIGYARVSSIDQNLERQLDNLKTFGVEKIFTEKRSGKSVENRPVFQEALNFVRMGDRFV 60  
MVIIGYARVSSIGQNLERQLDNLKTFGVEKIFTEKQSGKSVENRPVFQEALNFVRMGDRFV 60  
MIIGYARVSSIGQNLERQLDNLKTFGVEKIFTEKQSGKSVENRPVFQEALNFVRMGDRFV 60  
MIIGYARVSSIDQNLERQLDNLKTFGVEKIFTEKQSGNSVENRPVFQEALDFVRMGDRFA 60  
MIIGYARVSSIDQNLERQLDNLKTFGVEKIFTEKQSGKSVENRPVFQEALNFVRMGDRFV 60  
MIIGYARVSSIDQNLERQLDNLKTFGVEKIFTEKQSGKSVENRPVFQEALNFARMGDRFV 60

VESIDRLGRNYDEIIEIVNYLKEKDVQLMITSLEPMMNEVTGNPLLDKFMKDLIIQILAMV 120  
AESIDRLGRNYDEIIEIVNYLKEKGVQLMITSLEPMMNEVTGNPLLDKFMKDLTIRILAMV 120  
VESIDRLGRNYDEIIEIVNYLKEKGVQLMITSLEPMMNEVTGNPLLDKFMKDLVIQILAMV 120  
VESIDRLGRNYDEIIEIETANYLKERDVQLMITSLEPMMNEVTGNPLLDKFMKDLVIQILAMV 120  
VESVDRLGRNYDEIIEIETANYLKERDVQLMITSLEPMMNEVTGNPLLDKFMKDLTIRILAMV 120  
VESIDRLGRNYDEIIEIETANYLKEKDVQLMITSLEPMMNEVTGNPLLDKFMKDLIIQILAMV 120  
VESIDRLGRNYDEIIEIETANYLKEKDVQLMITSLEPMMNEVTGNPLLDKFMKDLIIRILAMV 120  
VESIDRLGRNYDEIIEIETANYLKEKDVQLMITSLEPMMNEVTGNPLLDKFMKDLIIRILAMV 120  
VESIDRLGRNYDEIIEIETANYLKEKDVQLMITSLEPMMDEVTGNPLLDKFMKDLIIRILAMV 120  
VESIDRLGRNYDEIIEIETVNYLKEKDVQLMITSLEPMMNEVTGNPLLDKFMKDLIIQILAMV 120  
VESIDRLGRNYDEIIEIETVNYLKEKDVQLMITSLEPMMNEVTGNPLLDKFMKDLIIRILAMV 120  
VESIDRLGRNYDEIIEIETVNYLKEKDAQLMITSLEPMMNGVTGNPLLDKFMKDLIIRILAMV 120  
VESIDRLGRNYDEIIEIETVNYLKEKDVQLMITSLEPMMNEVTGNPLLDKFMKDLIIRILAMV 120  
VESIDRLGRNYDEIIEIETVNYLKEKDVQLMITSLEPMMNEVTGNPLLDKFMKDLIIRILAMV 120  
VESIDRLGRNYDEIIEIETVNYLKEKDVQLMITSLEPMMNEVTGNPLLDKFMKDLIIRILAMV 120
